# Supplementary material for: Newborn screening and molecular features of patients with multiple acyl-CoA dehydrogenase deficiency in Quanzhou, China
Source: publisher site journal article supplement (doi:10.1515/jpem-2020-0694), 2021-04-07
Supplement: Supplementary file 1 [file j_jpem-2020-0694_suppl.docx]

**Table S1.** The multigene panel that used in the target NGS.

*ABCD4, ACAD8, ACADM, ACADS, ACADSB, ACADVL, ACAT1, AMT, ARG1, ASL, ASS1, ATP7B, AUH, BCKDHA, BCKDHB, BTD, CBS, CD320, CLPB, CPS1, CPT1A, CPT2, CTH, DBT, DLD, DNAJC19, DUOX2,* ***ETFA****,* ***ETFB****,* ***ETFDH****, ETHE1, FAH, G6PD, GCDH, GCH1, GCSH, GLDC, GPHN, HADH, HADHA, HADHB, HGD, HLCS, HMGCL, HPD, IVD, LMBRD1, MAT1A, MCCC1, MCCC2, MCEE, MLYCD, MMAA, MMAB, MMACHC, MMADHC, MOCS1, MOCS2, MTHFR, MMUT, OAT, OTC, PAH, PAX8, PC, PCBD1, PCCA, PCCB, PTS, QDPR, SERAC1, SLC22A5, SLC25A13, SLC25A15, SLC25A20, SLC5A5, SPR, SUCLA2, SUCLG1, SUOX, TAT, TG, TMEM70, TPO, TSHB,* and *TSHR.*
